# Supplementary material
Source: PubMed Central journal article supplement (PMC4186669)
Supplement: ic5011709_si_001.pdf [file ic5011709_si_001.pdf]

# Synthesis, Characterization and X-ray Attenuation Properties of Ultrasmall BiOI Nanoparticles: Towards Renal Clearable Particulate CT Contrast Agents

Murthi S. Kandanapitiye,<sup>a</sup> Min Gao,<sup>b</sup> Joseph Molter,<sup>c</sup> Chris A. Flask,<sup>\*c,d,e</sup> Songping D. Huang<sup>\*a</sup>

<sup>a</sup>Department of Chemistry and Biochemistry, and <sup>b</sup>Liquid Crystal Institute, Kent State University, Kent, OH 44240

<sup>c</sup>Case Center for Imaging Research at Department of Radiology, <sup>d</sup>Department of Biomedical Engineering, and <sup>e</sup>Department of Pediatrics, Case Western Reserve University, Cleveland, OH 44106

## Summary of structure determination for BiOI by X-ray powder diffraction

*Table S1 Crystal data*

|                                 |                                                                              |
|---------------------------------|------------------------------------------------------------------------------|
| BiOI                            | $F_{000} = 288$                                                              |
| $M_r = 351.88$                  | $D_x = 8.002 \text{ Mg m}^{-3}$                                              |
| Tetragonal, $P4/nmm$            | Melting point: ? K                                                           |
| Hall symbol: -P 4a 2a           | $K\alpha_1, K\alpha_2$ radiation, $\lambda = 1.540600, 1.544400 \text{ \AA}$ |
| $a = 3.99399(4) \text{ \AA}$    | $T = 295 \text{ K}$                                                          |
| $b = 3.99399(4) \text{ \AA}$    | Specimen shape: disk                                                         |
| $c = 9.15486(8) \text{ \AA}$    | $12 \times 12 \times 0.2 \text{ mm}$                                         |
| $V = 146.038 (3) \text{ \AA}^3$ | Particle morphology: plate-like, red-orange                                  |
| $Z = 2$                         |                                                                              |

### *Data collection*

|                                  |                               |
|----------------------------------|-------------------------------|
| D8 Advance powder diffractometer | $T = 295 \text{ K}$           |
| Radiation source: sealed tube    | $2\theta_{\min} = 7.00^\circ$ |

Monochromator: Ni beta-filter  $2\theta_{\max} = 109.07^\circ$   
 Specimen mounted in reflection mode Increment in  $2\theta = 0.02^\circ$   
 Background-less sample holder Scan method: step

---

*Refinement*

---

Least-squares matrix: full 54 parameters  
 $R_p = 0.027$  2 constraints  
 $R_{wp} = 0.036$   $S = 1.39$   
 $R_{exp} = 0.026$   $(\Delta/\sigma)_{\max} = 0.04$   
 $R_{F2} = 0.016$

Profile function: CW Profile function number 3 with 19 terms, Pseudovoigt profile coefficients as parameterized in P. Thompson, D.E. Cox & J.B. Hastings (1987). J. Appl. Cryst.,20,79-83. Asymmetry correction of L.W. Finger, D.E. Cox & A. P. Jephcoat (1994). J. Appl. Cryst.,27,892-900.

Preferred orientation correction: March-Dollase, Ratio= 0.64143, h= 0, k= 0, l= 1; Preferred orientation correction range: Min= 0.4097, Max= 5.3361

#1(GU) = 119.081 #2(GV) = -5.084 #3(GW) = 11.207  
 #4(GP) = 25.131 #5(LX) = 1.863 #6(LY) = 26.859  
 #7(S/L) = 0.0103 #8(H/L) = 0.0103 #9(trns) = 2.18  
 #10(shft) = -8.9199 #11(stec) = -9.60 #12(pte) = 14.58  
 #13(sfec) = 0.00 #14(L11) = -0.469 #15(L22) = -1.237  
 #16(L33) = 0.031 #17(L12) = 0.358 #18(L13) = 0.126  
 #19(L23) = 0.292

Peak tails are ignored where the intensity is below 0.005 times the peak Aniso. broadening axis 0 0 1.

---

**Table S2** Fractional atomic coordinates and isotropic displacement parameters ( $\text{\AA}^2$ )

|     | <i>x</i> | <i>y</i> | <i>z</i>    | $U_{\text{iso}}$ |
|-----|----------|----------|-------------|------------------|
| Bi1 | 0.25     | 0.25     | 0.13358 (3) | 0.01169 (7)      |
| O1  | 0.25     | 0.75     | 0.0         | 0.01169 (7)      |
| I1  | 0.25     | 0.25     | 0.66586 (5) | 0.01169 (7)      |

*Table S3 Geometric parameters (Å, °)*

|                                         |              |                                           |             |
|-----------------------------------------|--------------|-------------------------------------------|-------------|
| Bi1—O1 <sup>i</sup>                     | 2.3417(2)    | O1—Bi1                                    | 2.3417(2)   |
| Bi1—O1                                  | 2.3417(2)    | O1—Bi1 <sup>viii</sup>                    | 2.3417(2)   |
| Bi1—O1 <sup>ii</sup>                    | 2.3417(2)    | O1—Bi1 <sup>ix</sup>                      | 2.3417(2)   |
| Bi1—O1 <sup>iii</sup>                   | 2.3417(2)    | O1—Bi1 <sup>x</sup>                       | 2.3417(2)   |
| Bi1—I1 <sup>iv</sup>                    | 3.3686(3)    | I1—Bi1 <sup>iv</sup>                      | 3.3686(3)   |
| Bi1—I1 <sup>v</sup>                     | 3.3686(3)    | I1—Bi1 <sup>v</sup>                       | 3.3686(3)   |
| Bi1—I1 <sup>vi</sup>                    | 3.3686(3)    | I1—Bi1 <sup>vi</sup>                      | 3.3686(3)   |
| Bi1—I1 <sup>vii</sup>                   | 3.3686(3)    | I1—Bi1 <sup>vii</sup>                     | 3.3686(3)   |
| O1 <sup>i</sup> —Bi1—O1                 | 117.036(13)  | O1 <sup>iii</sup> —Bi1—I1 <sup>vi</sup>   | 77.237(5)   |
| O1 <sup>i</sup> —Bi1—O1 <sup>ii</sup>   | 74.174(6)    | O1 <sup>iii</sup> —Bi1—I1 <sup>vii</sup>  | 77.237(5)   |
| O1 <sup>i</sup> —Bi1—O1 <sup>iii</sup>  | 74.174(6)    | I1 <sup>iv</sup> —Bi1—I1 <sup>v</sup>     | 72.716(7)   |
| O1 <sup>i</sup> —Bi1—I1 <sup>iv</sup>   | 77.237(5)    | I1 <sup>iv</sup> —Bi1—I1 <sup>vi</sup>    | 72.716(7)   |
| O1 <sup>i</sup> —Bi1—I1 <sup>v</sup>    | 142.2063(14) | I1 <sup>iv</sup> —Bi1—I1 <sup>vii</sup>   | 113.940(15) |
| O1 <sup>i</sup> —Bi1—I1 <sup>vi</sup>   | 77.237(5)    | I1 <sup>v</sup> —Bi1—I1 <sup>vi</sup>     | 113.940(15) |
| O1 <sup>i</sup> —Bi1—I1 <sup>vii</sup>  | 142.2063(14) | I1 <sup>v</sup> —Bi1—I1 <sup>vii</sup>    | 72.716(7)   |
| O1—Bi1—O1 <sup>ii</sup>                 | 74.174(6)    | I1 <sup>vi</sup> —Bi1—I1 <sup>vii</sup>   | 72.716(7)   |
| O1—Bi1—O1 <sup>iii</sup>                | 74.174(6)    | Bi1—O1—Bi1 <sup>viii</sup>                | 117.036(13) |
| O1—Bi1—I1 <sup>iv</sup>                 | 142.2063(14) | Bi1—O1—Bi1 <sup>ix</sup>                  | 105.826(6)  |
| O1—Bi1—I1 <sup>v</sup>                  | 77.237(5)    | Bi1—O1—Bi1 <sup>x</sup>                   | 105.826(6)  |
| O1—Bi1—I1 <sup>vi</sup>                 | 142.2063(14) | Bi1 <sup>viii</sup> —O1—Bi1 <sup>ix</sup> | 105.826(6)  |
| O1—Bi1—I1 <sup>vii</sup>                | 77.237(5)    | Bi1 <sup>viii</sup> —O1—Bi1 <sup>x</sup>  | 105.826(6)  |
| O1 <sup>ii</sup> —Bi1—O1 <sup>iii</sup> | 117.036(13)  | Bi1 <sup>ix</sup> —O1—Bi1 <sup>x</sup>    | 117.036(13) |
| O1 <sup>ii</sup> —Bi1—I1 <sup>iv</sup>  | 77.237(5)    | Bi1 <sup>iv</sup> —I1—Bi1 <sup>v</sup>    | 72.716(7)   |

|                        |               |                         |              |
|------------------------|---------------|-------------------------|--------------|
| $O1^{ii}-Bi1-I1^v$     | 77.237 (5)    | $Bi1^{iv}-I1-Bi1^{vi}$  | 72.716 (7)   |
| $O1^{ii}-Bi1-I1^{vi}$  | 142.2063 (14) | $Bi1^{iv}-I1-Bi1^{vii}$ | 113.940 (15) |
| $O1^{ii}-Bi1-I1^{vii}$ | 142.2063 (14) | $Bi1^v-I1-Bi1^{vi}$     | 113.940 (15) |
| $O1^{iii}-Bi1-I1^{iv}$ | 142.2063 (14) | $Bi1^v-I1-Bi1^{vii}$    | 72.716 (7)   |
| $O1^{iii}-Bi1-I1^v$    | 142.2063 (14) | $Bi1^{vi}-I1-Bi1^{vii}$ | 72.716 (7)   |

Symmetry codes: (i)  $x, y-1, z$ ; (ii)  $1/2-y, x, z$ ; (iii)  $3/2-y, x, z$ ; (iv)  $-x, -y, 1-z$ ; (v)  $-x, 1-y, 1-z$ ;  
(vi)  $1-x, -y, 1-z$ ; (vii)  $1-x, 1-y, 1-z$ ; (viii)  $x, y+1, z$ ; (ix)  $-x, 1-y, -z$ ; (x)  $1-x, 1-y, -z$ .

Data collection: *XRD commander*; cell refinement: *GSAS*; program(s) used to refine structure: *GSAS*; software used to prepare material for publication: *Platon, publCIF*.

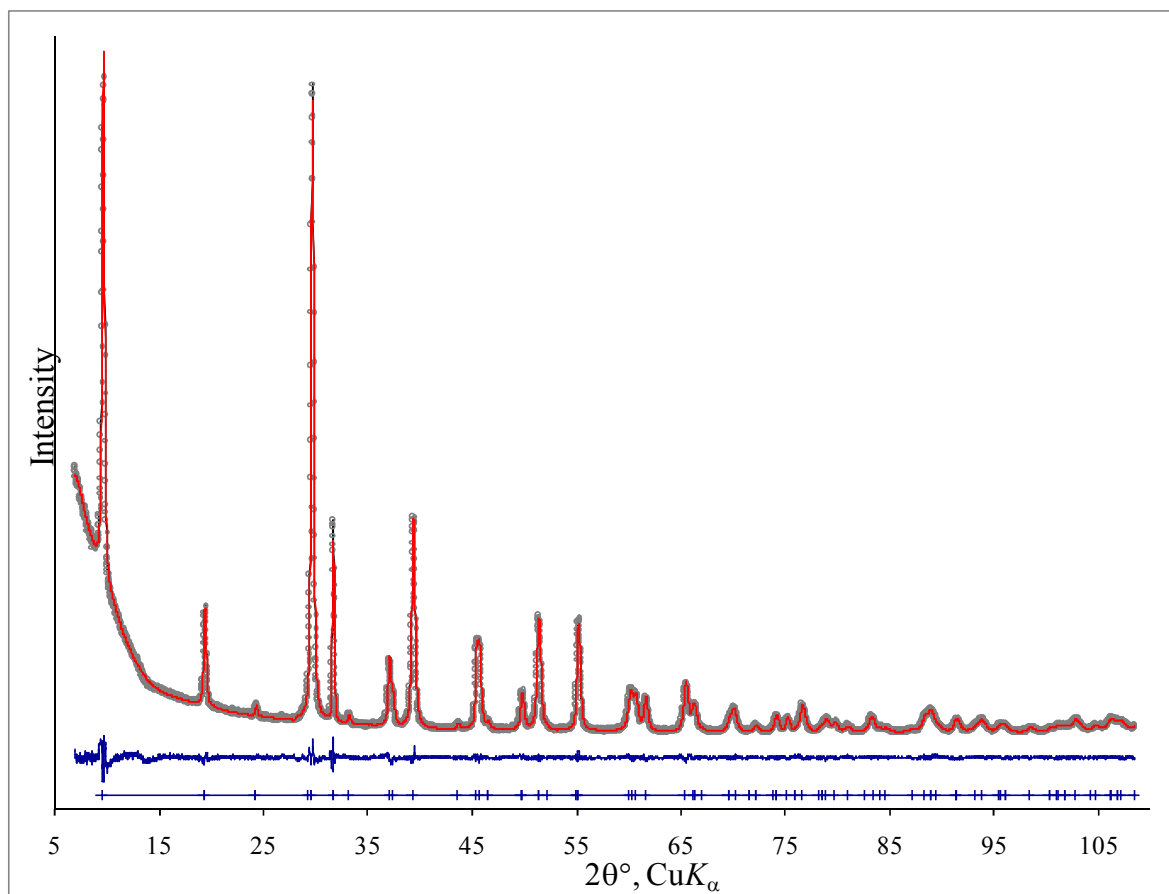

**Figure S1** Rietveld refinement plot of BiOI with the difference between observed and calculated patterns shown at the bottom and the reflection positions shown as the vertical lines

## Other spectroscopic characterization data

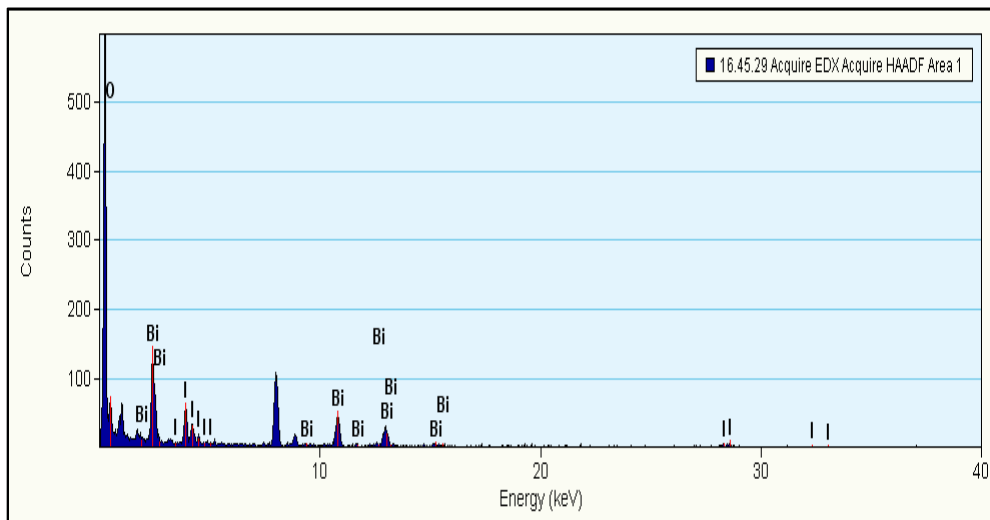

**Figure S2** EDX spectrum of a typical PVP-coated BiOI nanoparticle

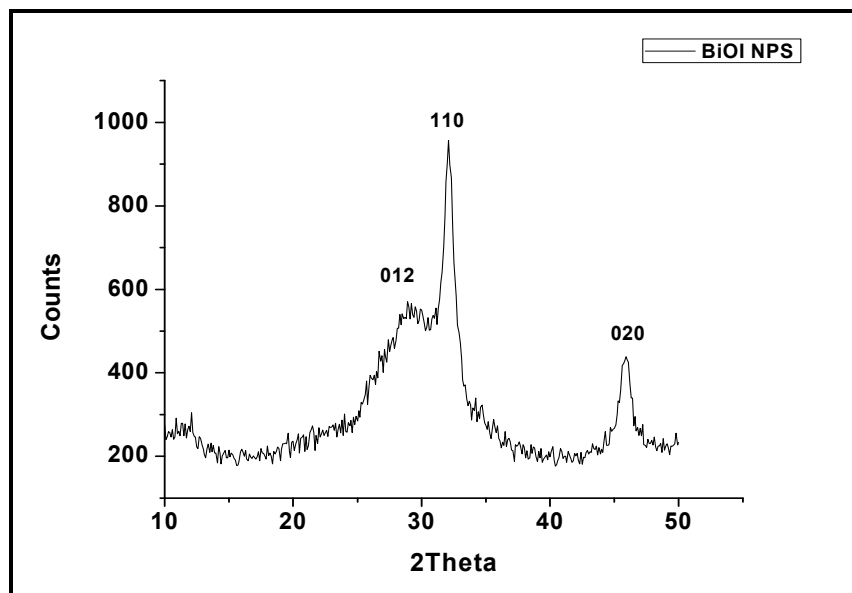

**Figure S3** X-ray powder diffraction patterns of the BiOI NPs

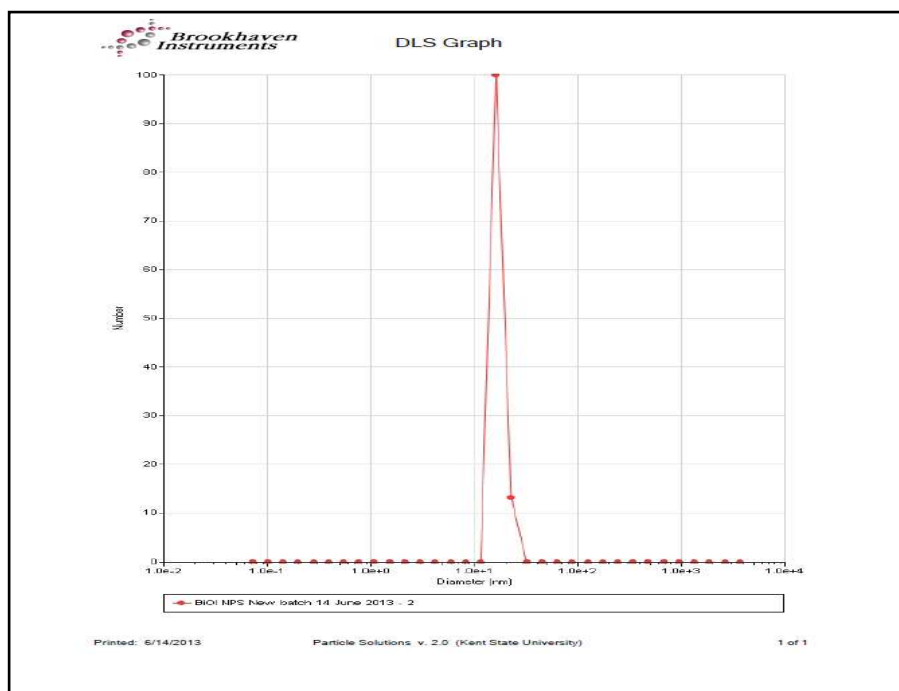

**Figure S4** Particle size distribution of PVP-coated BiOI NPs in water dispersion

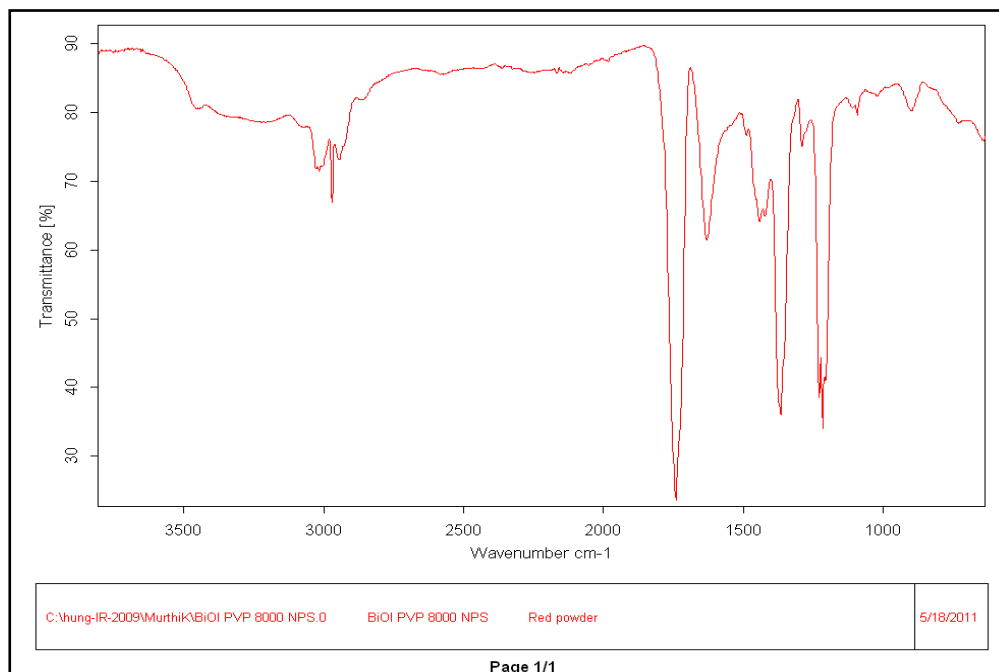

**Figure S5** The FT-IR spectrum of PVP-coated BiOI NPs

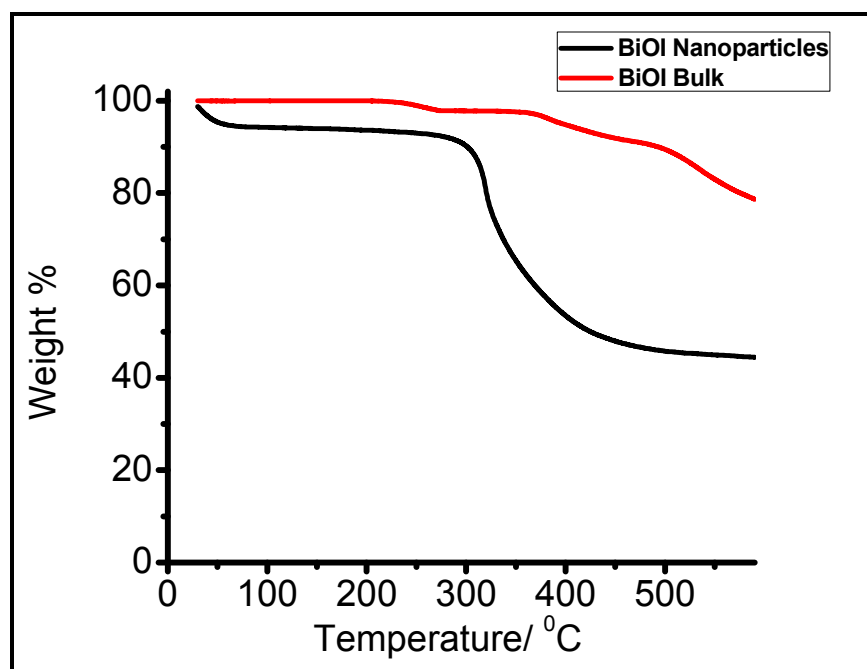

**Figure S6** The TGA curve of PVP-coated BiOI NP

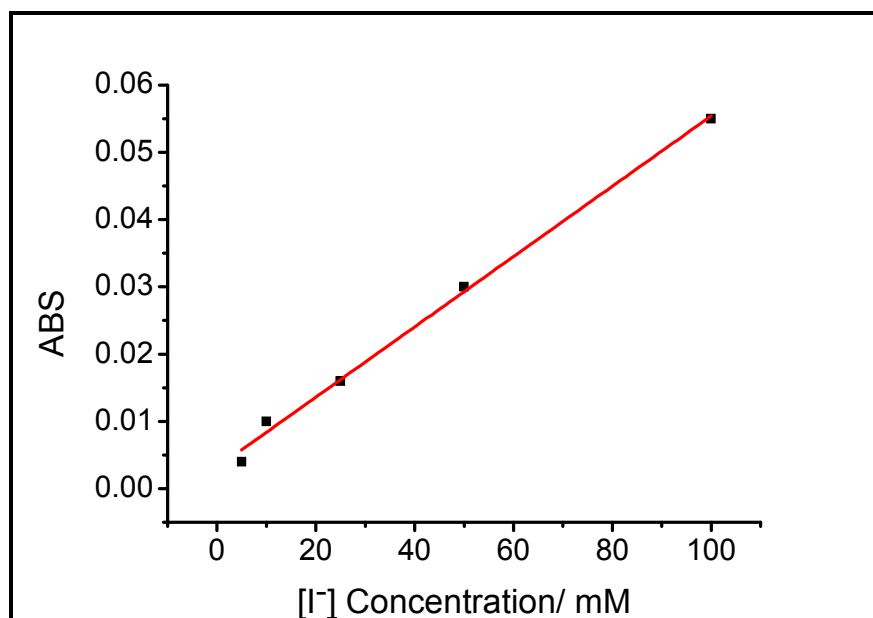

**Figure S7** Calibration curve of absorbance vs. I<sup>-</sup> concentration

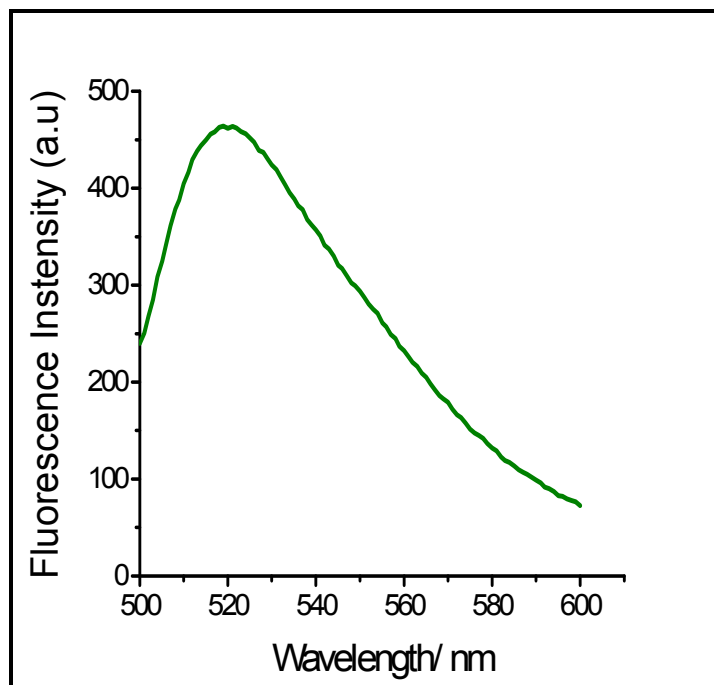

**Figure S8** Fluorescence emission spectrum of dye-conjugated BiOI NPs
